# Supplementary material for: Knockdown of TRPM8 Suppresses Cancer Malignancy and Enhances Epirubicin-induced Apoptosis in Human Osteosarcoma Cells
Source: PubMed Central journal article supplement — Int J Biol Sci. 2013 Dec 22;10(1):90–102. doi: 10.7150/ijbs.7738 (PMC3879595; doi:10.7150/ijbs.7738), 2013-12-22

**Supplementary Fig. 1.** The inhibitory effect of TRPM8 knockdown on the invasion and metastasis was not caused by reduced cell viability and/or proliferation. A: The CCK-8 assay was performed to examine the proliferation status of siCON and siTRPM8 cells and the result revealed that there was no difference between siCON and siTRPM8 cells after incubation in 1% FBS medium for 24h. T-text was used for the data analysis. OD in y-axis means A450nm and represents cell growth; bars, SD. B: siCON and siTRPM8 cells were prepared for Annexin V-FITC assay after incubation in 1% FBS medium for 24h. C: The result of Annexin V-FITC assay was showed in histogram. T-text was used for the data analysis and there was no statistical difference between siCON and siTRPM8 cells in cell apoptosis.

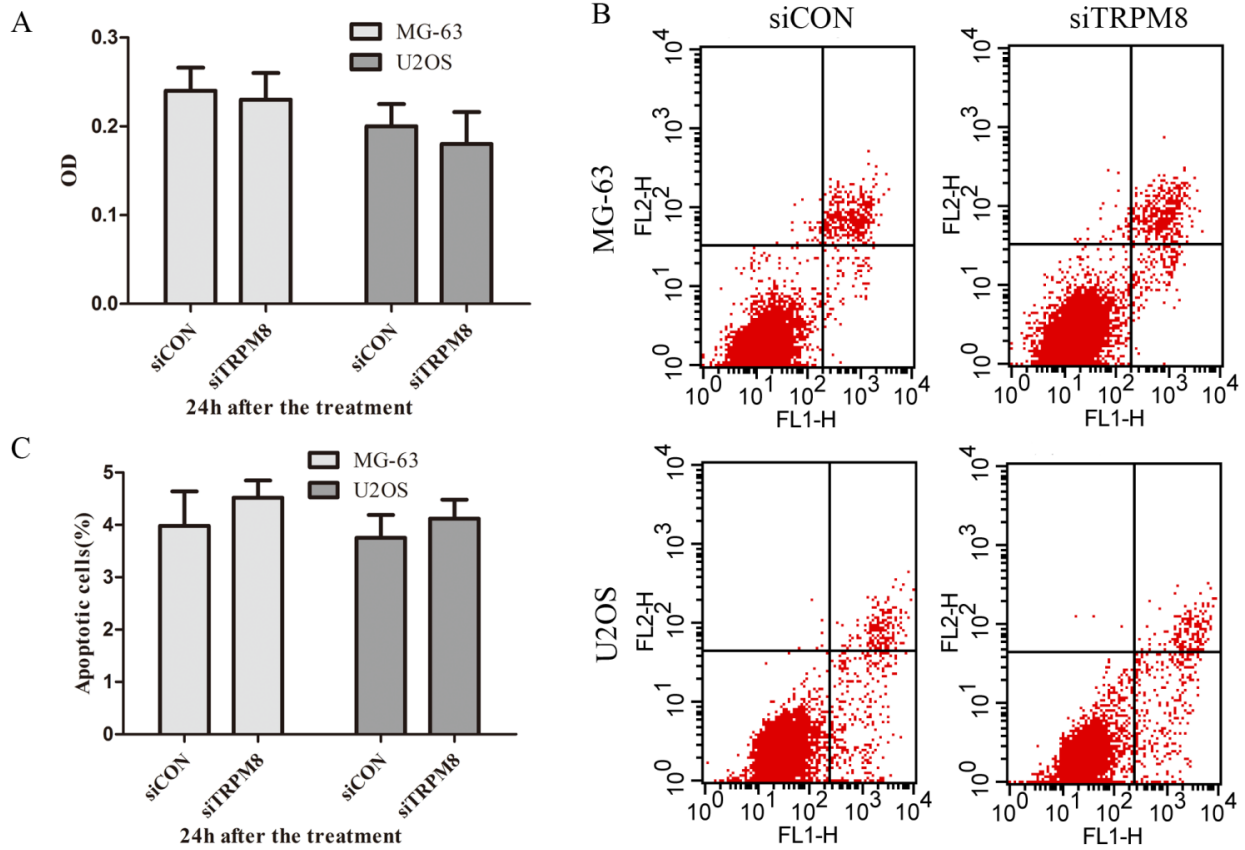

Supplement: ijbsv10p0090s1.pdf [file ijbsv10p0090s1.pdf]
